# Supplementary material for: Salt Stress Differentially Affects the Primary and Secondary Metabolism of Peppers (Capsicum annuum L.) According to the Genotype, Fruit Part, and Salinity Level
Source: MDPI journal article supplement (doi:10.3390/plants11070853), 2022-03-23
Supplement: s1 [file s1]

RT: 5.99 - 25.47

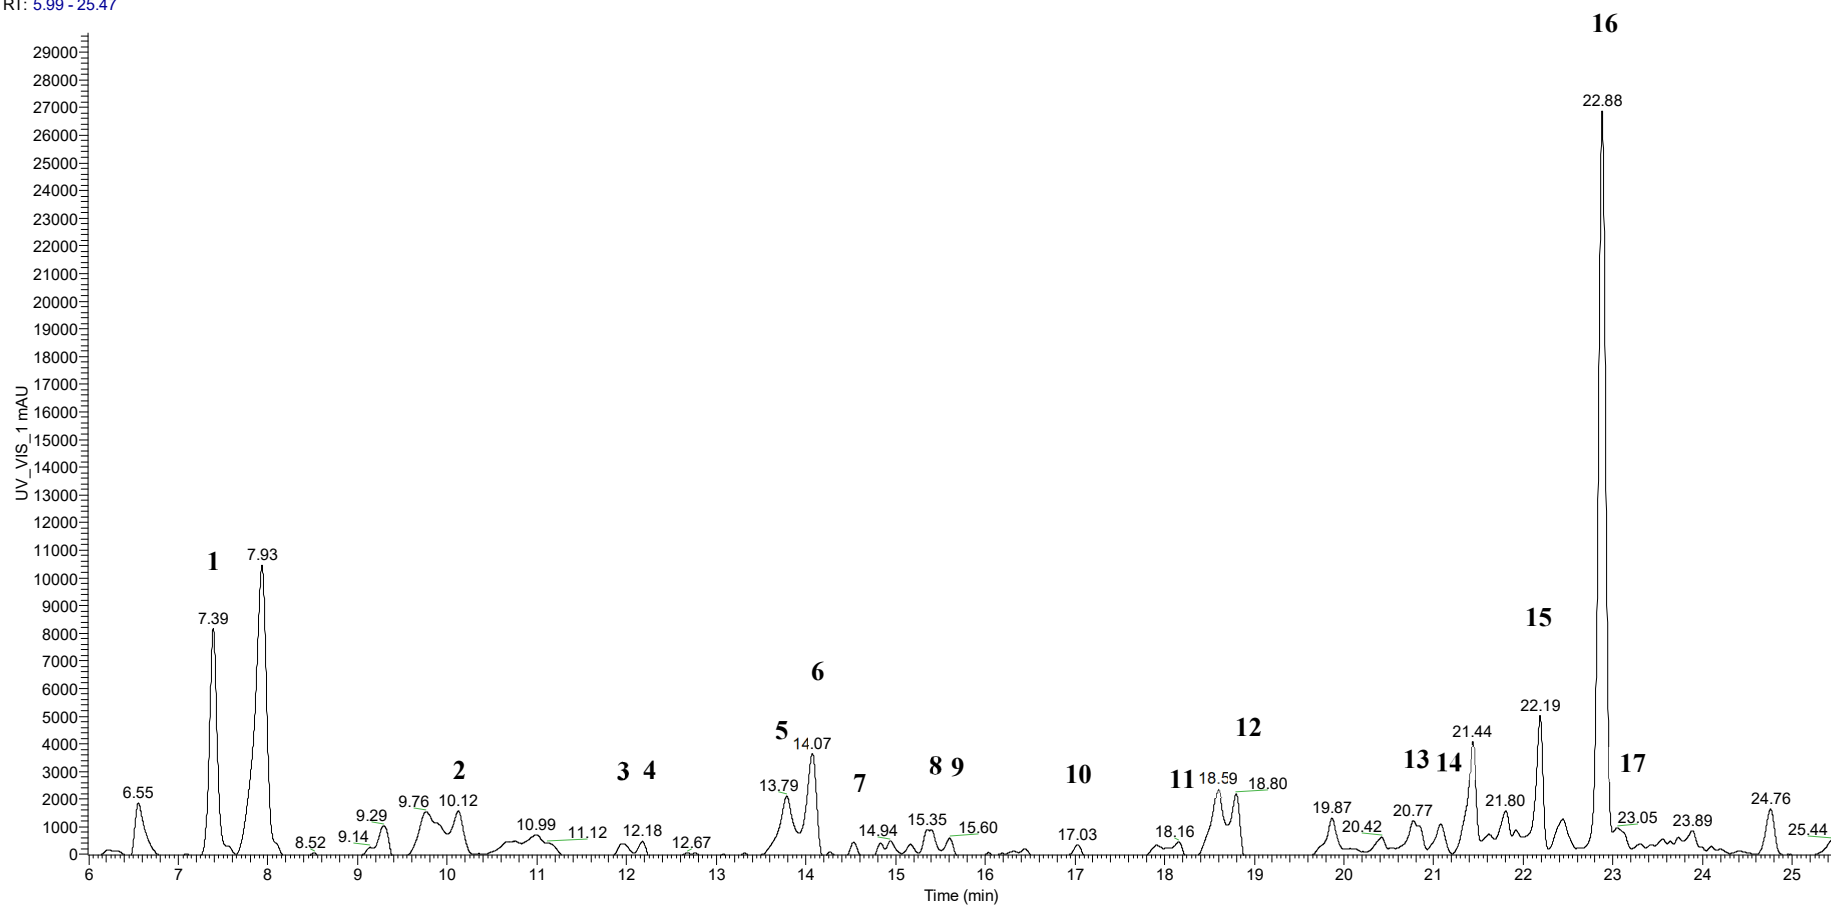

**Figure S1.** Full scan on a HPLC-MS, and the phenolic compounds identified for pericarp. **1**= Coumaroylquinic acid derivative 1; **2**= Caffeic acid hexoside 1; **3**= Caffeic acid hexoside 2; **4**= *p*-coumaroylquinic acid; **5**= Caffeic acid hexoside derivative; **6**= Ferulic acid hexoside 1; **7**= Ferulic acid hexoside 2; **8**= Chlorogenic acid; **9**= Apigenin pentosyl hexoside 1 ; **10**= Apigenin pentosyl hexoside 2; **11**= Apigenin pentosyl hexoside 3; **12**= Luteolin-8-C-hexoside 1; **13**= Luteolin-8-C-hexoside 2; **14**= Kaempferol dihexoside; **15**= Quercetin rutinoside ; **16**= Quercetin rhamnoside; **17**= Luteolin-7-O- hexoside; **18**= Isorhamnetin rhamnoside.

RT: 6.99 - 26.11

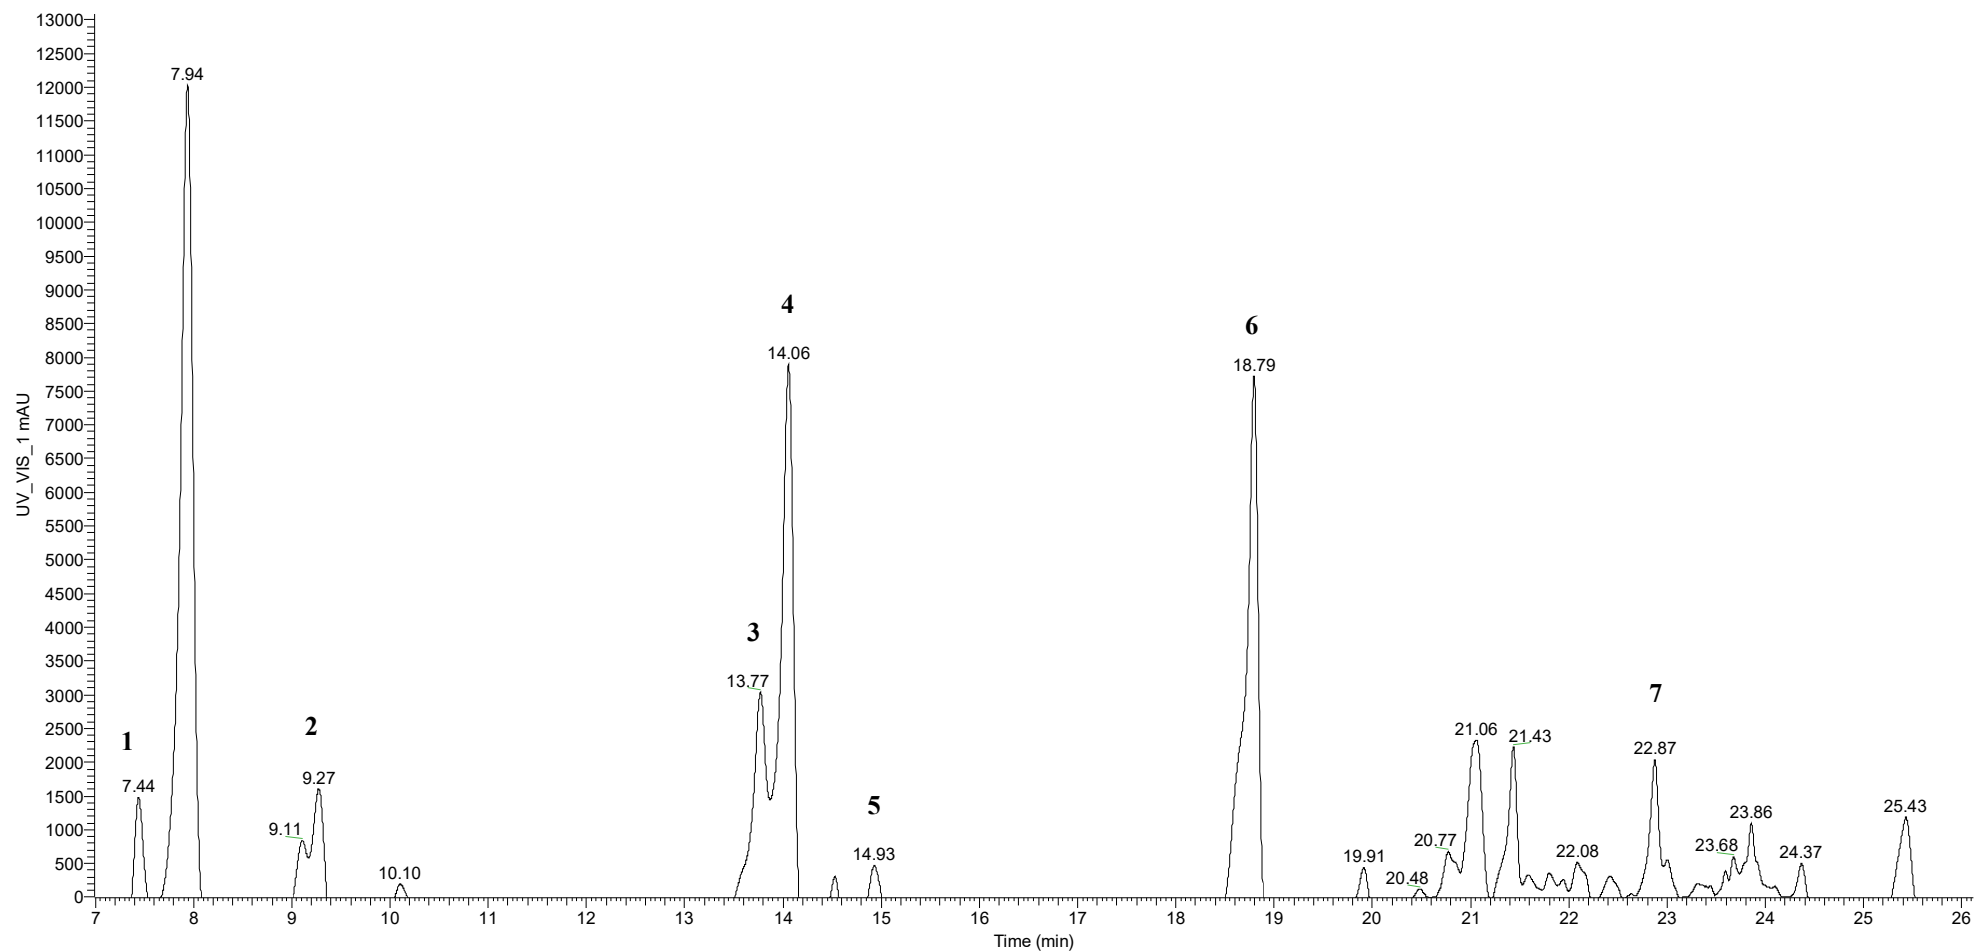

**Figure S2.** Full scan on a HPLC-MS, and the phenolic compounds identified for placenta. **1**= Coumaroylquinic acid derivative **1**; **2**= Tricin; **3**= Caffeic acid hexoside derivative; **4**= Ferulic acid hexoside **1**; **5**= Apigenin pentosyl hexoside **1**; **6**= Luteolin-8-C-hexoside **1**; **7**= Quercetin rhamnoside.

RT: 9.82 - 27.78

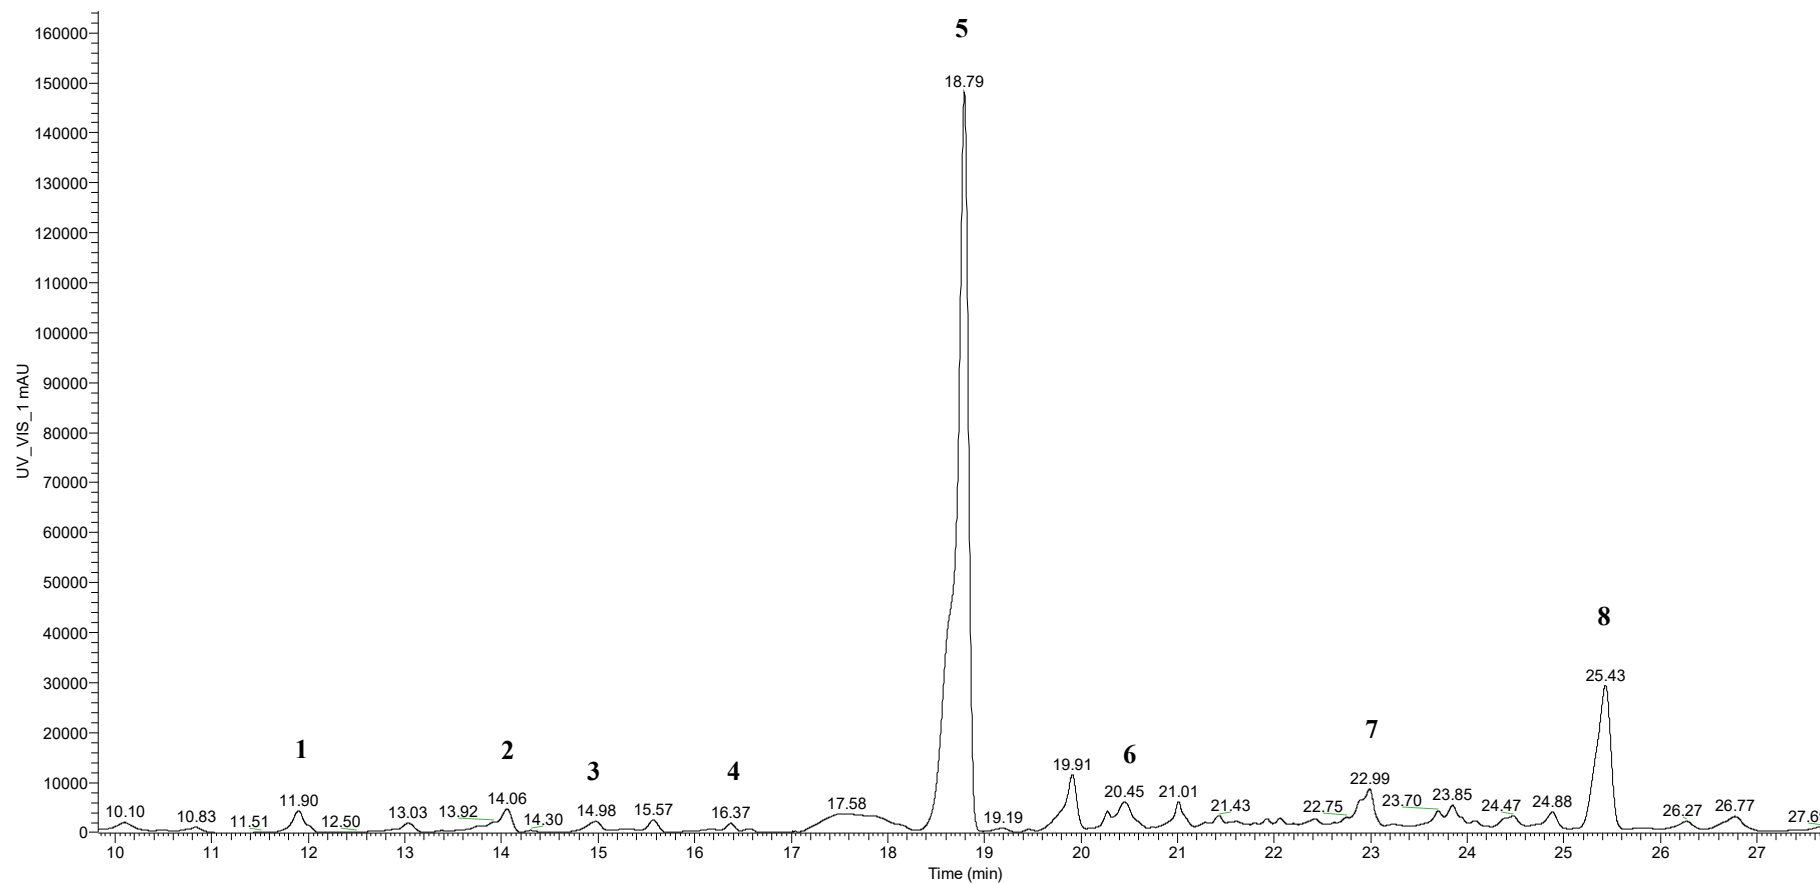

**Figure S3.** Full scan on a HPLC-MS, and the phenolic compounds identified for seeds. **1**= Caffeic acid hexoside 2; **2**= Ferulic acid hexoside 1; **3**= Ferulic acid hexoside 2; **4**= Caffeic acid hexoside 3; **5**= Luteolin-8-C-hexoside 1; **6**= Luteolin-8-C-hexoside 2; **7**= Kaempferol hexoside 1; **8**= Kaempferol hexoside 2

**Table S1.** Individual and total phenolics of three fruit parts of the 'Somborka' cultivar under salt stressed (mg 100 g<sup>-1</sup> DW; mean ± SE).

| Cultivar   | Fruit part | Phenolics                                   | Treatment           |          |                      |          |                     |              |     |
|------------|------------|---------------------------------------------|---------------------|----------|----------------------|----------|---------------------|--------------|-----|
|            |            |                                             | Control             |          | 20 mM NaCl           |          | 40 mM NaCl          | Significance |     |
| 'Somborka' | Pericarp   | Coumaroylquinic acid derivative 1           | 13.91 ± 1.15        | c        | 23.55 ± 4.82         | b        | 35.46 ± 9.37        | a            | *** |
|            |            | Caffeic acid hexoside 1                     | 4.79 ± 1.10         | c        | 25.37 ± 6.88         | b        | 37.10 ± 2.90        | a            | *** |
|            |            | Caffeic acid hexoside 2                     | 15.92 ± 4.44        | a        | 16.65 ± 3.68         | a        | 8.93 ± 1.40         | a            | NS  |
|            |            | <i>p</i> -coumaroylquinic acid              | 5.67 ± 1.22         | c        | 6.71 ± 1.47          | b        | 7.82 ± 1.08         | a            | *** |
|            |            | Caffeic acid hexoside derivative            | 3.60 ± 0.84         | c        | 12.55 ± 3.44         | b        | 45.15 ± 5.28        | a            | **  |
|            |            | Ferulic acid hexoside 1                     | 1.18 ± 0.24         | c        | 17.42 ± 5.43         | b        | 74.19 ± 4.03        | a            | *** |
|            |            | Ferulic acid hexoside 2                     | 7.94 ± 0.93         | c        | 7.67 ± 1.11          | b        | 10.18 ± 1.48        | a            | *** |
|            |            | Chlorogenic acid                            | 5.48 ± 0.98         | c        | 20.40 ± 4.11         | b        | 43.67 ± 1.49        | a            | *** |
|            |            | <b>Total analyzed Hydroxycinnamic acids</b> | <b>58.49 ± 5.42</b> | <b>c</b> | <b>130.32 ± 6.28</b> | <b>b</b> | <b>262.5 ± 3.52</b> | <b>a</b>     | *** |
|            |            | Apigenin pentysil hexoside 1                | 0.04 ± 0.01         | c        | 8.07 ± 3.60          | b        | 14.67 ± 3.56        | a            | *** |
|            |            | Apigenin pentosyl hexoside 2                | 11.56 ± 1.09        | a        | 13.35 ± 1.96         | a        | 12.93 ± 4.55        | a            | NS  |
|            |            | Apigenin pentosyl hexoside 3                | 17.62 ± 2.18        | c        | 29.29 ± 1.24         | b        | 59.18 ± 4.29        | a            | *** |
|            |            | Luteolin-8-C-hexoside 1                     | 185.64 ± 4.97       | c        | 281.02 ± 7.28        | b        | 366.11 ± 8.35       | a            | **  |
|            |            | Luteolin-8-C-hexoside 2                     | 13.99 ± 6.99        | c        | 112.64 ± 13.77       | b        | 151.90 ± 26.37      | a            | *** |
|            |            | Luteolin-7- <i>O</i> - hexoside             | 699.42 ± 35.10      | c        | 968.03 ± 68.98       | b        | 1190.90 ± 75.83     | a            | *** |

|          |                                             |                        |          |                        |          |                         |          |     |
|----------|---------------------------------------------|------------------------|----------|------------------------|----------|-------------------------|----------|-----|
| Placenta | <b>Total analyzed Flavone</b>               | <b>916.66 ± 10.63</b>  | <b>c</b> | <b>1412.41 ± 34.63</b> | <b>b</b> | <b>1795.70 ± 37.65</b>  | <b>a</b> | *** |
|          | Kaempferol dihexoside                       | 3.60 ± 9.43            | c        | 8.47 ± 0.41            | b        | 9.43 ± 0.85             | a        | *   |
|          | Quercetin rutinoside                        | 7.14 ± 1.63            | a        | 32.75 ± 4.55           | a        | 19.63 ± 1.98            | a        | NS  |
|          | Quercetin rhamnoside                        | 255.50 ± 4.22          | c        | 362.60 ± 5.22          | b        | 304.22 ± 2.48           | a        | **  |
|          | Isoramnetin rhamnoside                      | 23.17 ± 4.12           | c        | 26.81 ± 1.23           | b        | 34.14 ± 3.00            | a        | *** |
|          | <b>Total analyzed Flavonols</b>             | <b>289.41 ± 20.63</b>  | <b>c</b> | <b>430.63 ± 32.59</b>  | <b>b</b> | <b>367.42 ± 29.86</b>   | <b>a</b> | *** |
|          | <b>Total analyzed phenolics</b>             | <b>1264.56 ± 43.63</b> | <b>c</b> | <b>1973.36 ± 99.60</b> | <b>b</b> | <b>2425.62 ± 123.83</b> | <b>a</b> | *** |
|          | Coumaroylquinic acid derivative 1           | 65.47 ± 1.31           | a        | 29.69 ± 1.56           | c        | 53.94 ± 5.92            | b        | *** |
|          | Caffeic acid hexoside derivative            | 133.74 ± 6.32          | a        | 25.18 ± 1.17           | c        | 71.84 ± 6.35            | b        | *** |
|          | Ferulic acid hexoside 1                     | 182.60 ± 14.86         | a        | 31.90 ± 5.73           | c        | 119.18 ± 9.78           | b        | *   |
|          | <b>Total analyzed Hydroxycinnamic acids</b> | <b>381.81 ± 22.62</b>  | <b>a</b> | <b>86.77 ± 8.55</b>    | <b>c</b> | <b>244.96 ± 9.42</b>    | <b>b</b> | *** |
|          | Apigenin pentosyl hexoside 1                | 54.18 ± 2.50           | a        | 36.99 ± 1.05           | a        | 42.01 ± 6.90            | a        | NS  |
|          | Luteolin-8-C-hexoside 1                     | 317.26 ± 4.94          | a        | 106.88 ± 4.72          | c        | 219.63 ± 8.31           | b        | **  |
| Seeds    | Tricin                                      | 328.68 ± 16.28         | a        | 229.13 ± 7.25          | a        | 389.80 ± 4.65           | a        | NS  |
|          | <b>Total analyzed Flavone</b>               | <b>700.11 ± 65.43</b>  | <b>a</b> | <b>372.99 ± 21.35</b>  | <b>c</b> | <b>651.44 ± 23.55</b>   | <b>b</b> | *** |
|          | Quercetin rhamnoside                        | 31.46 ± 1.32           | a        | 19.77 ± 7.78           | a        | 71.47 ± 6.70            | a        | NS  |
|          | <b>Total analyzed Flavonols</b>             | <b>31.46 ± 1.32</b>    | <b>a</b> | <b>19.77 ± 7.78</b>    | <b>a</b> | <b>71.47 ± 6.70</b>     | <b>a</b> | NS  |
|          | <b>Total analyzed phenolics</b>             | <b>1133.28 ± 78.72</b> | <b>a</b> | <b>512.06 ± 60.09</b>  | <b>c</b> | <b>1008.99 ± 45.49</b>  | <b>b</b> | *** |
|          | Caffeic acid hexoside 2                     | 149.61 ± 5.75          | a        | 201.24 ± 2.19          | a        | 111.15 ± 1.24           | a        | NS  |
|          | Ferulic acid hexoside 1                     | 25.03 ± 5.22           | b        | 53.98 ± 7.13           | a        | 50.92 ± 6.03            | a        | *** |
|          | Ferulic acid hexoside 2                     | 34.77 ± 22.42          | a        | 59.59 ± 17.99          | a        | 37.64 ± 1.58            | a        | NS  |

|                                             |                        |          |                        |          |                        |           |     |
|---------------------------------------------|------------------------|----------|------------------------|----------|------------------------|-----------|-----|
| Caffeic acid hexoside 3                     | 598.91 ± 18.43         | <b>b</b> | 1421.31 ± 98.25        | <b>a</b> | 1488.02 ± 35.89        | <b>a</b>  | *** |
| <b>Total analyzed Hydroxycinnamic acids</b> | <b>808.31 ± 43.42</b>  | <b>b</b> | <b>1736.12 ± 53.66</b> | <b>a</b> | <b>1687.73 ± 26.45</b> | <b>a</b>  | *** |
| Luteolin-8-C-hexoside 1                     | 1016.98 ± 49.40        | <b>b</b> | 2410.33 ± 44.89        | <b>a</b> | 1135.74 ± 47.41        | <b>ab</b> | **  |
| Luteolin-8-C-hexoside 2                     | 102.20 ± 3.34          | <b>c</b> | 148.43 ± 9.61          | <b>b</b> | 758.22 ± 49.82         | <b>a</b>  | *** |
| <b>Total analyzed Flavone</b>               | <b>1119.18 ± 56.53</b> | <b>c</b> | <b>2558.76 ± 63.98</b> | <b>a</b> | <b>1893.96 ± 47.86</b> | <b>b</b>  | **  |
| Kempferol hexoside 1                        | 13.71 ± 3.64           | <b>c</b> | 18.65 ± 6.58           | <b>b</b> | 206.72 ± 25.64         | <b>a</b>  | *** |
| Kempferol hexoside 2                        | 24.39 ± 9.99           | <b>a</b> | 18.25 ± 12.90          | <b>a</b> | 25.19 ± 2.36           | <b>a</b>  | NS  |
| <b>Total analyzed Flavonols</b>             | <b>38.09 ± 1.52</b>    | <b>b</b> | <b>36.90 ± 2.31</b>    | <b>b</b> | <b>231.91 ± 10.52</b>  | <b>a</b>  | *** |
| <b>Total analyzed phenolics</b>             | <b>1965.58 ± 58.85</b> | <b>c</b> | <b>4331.78 ± 77.74</b> | <b>a</b> | <b>3813.60 ± 73.08</b> | <b>b</b>  | *** |

---

different letters in the row (a, b, c) indicates statistical differences among treatments Significance codes: \*\*\* ≤ 0.001; \*\* ≤ 0.01; \* ≤ 0.05; NS > 0.05

**Table S2.** Individual and total phenolics of three fruit parts of the 'Novosadka' cultivar under salt stressed (mg 100 g<sup>-1</sup> DW; mean  $\pm$  SE).

| Cultivar    | Fruit part | Phenolics                                   | Treatment             |          |                       |          |                       |          |              |
|-------------|------------|---------------------------------------------|-----------------------|----------|-----------------------|----------|-----------------------|----------|--------------|
|             |            |                                             | Control               |          | 20 mM NaCl            |          | 40 mM NaCl            |          | Significance |
| 'Novosadka' | Pericarp   | Coumaroylquinic acid derivative 1           | 24.40 ± 9.10          | a        | 20.78 ± 4.36          | a        | 34.83 ± 7.02          | a        | NS           |
|             |            | Caffeic acid hexoside 1                     | 29.49 ± 1.28          | a        | 17.59 ± 3.28          | a        | 26.91 ± 1.20          | a        | NS           |
|             |            | Caffeic acid hexoside 2                     | 21.63 ± 4.87          | a        | 11.70 ± 4.56          | a        | 31.87 ± 1.85          | a        | NS           |
|             |            | <i>p</i> -coumaroylquinic acid              | 6.13 ± 1.46           | a        | 3.53 ± 0.19           | a        | 8.80 ± 0.84           | a        | NS           |
|             |            | Caffeic acid hexoside derivative            | 21.93 ± 5.90          | a        | 19.22 ± 2.29          | a        | 29.11 ± 4.10          | a        | NS           |
|             |            | Ferulic acid hexoside 1                     | 17.87 ± 5.80          | c        | 19.30 ± 3.84          | b        | 27.05 ± 0.47          | a        | ***          |
|             |            | Ferulic acid hexoside 2                     | 4.59 ± 0.14           | a        | 8.85 ± 3.26           | a        | 6.40 ± 3.16           | a        | NS           |
|             |            | Chlorogenic acid                            | 21.40 ± 4.74          | a        | 30.09 ± 7.37          | a        | 22.39 ± 2.70          | a        | NS           |
|             |            | <b>Total analyzed Hydroxycinnamic acids</b> | <b>147.49 ± 2.16</b>  | <b>a</b> | <b>131.06 ± 3.17</b>  | <b>a</b> | <b>187.36± 2.63</b>   | <b>a</b> | NS           |
|             |            | Apigenin pentysil hexoside 1                | 5.97 ± 1.07           | a        | 12.95 ± 3.63          | a        | 6.78 ± 0.53           | a        | NS           |
|             |            | Apigenin pentosyl hexoside 2                | 2.77 ± 0.66           | a        | 5.18 ± 1.99           | a        | 0.96 ± 0.20           | a        | NS           |
|             |            | Apigenin pentosyl hexoside 3                | 13.43 ± 4.56          | a        | 22.12 ± 2.25          | a        | 20.97 ± 5.23          | a        | NS           |
|             |            | Luteolin-8-C-hexoside 1                     | 89.15 ± 6.57          | a        | 111.50 ± 21.97        | a        | 106.26 ± 12.92        | a        | NS           |
|             |            | Luteolin-8-C-hexoside 2                     | 81.98 ± 7.98          | a        | 87.93 ± 18.05         | a        | 67.05 ± 7.77          | a        | NS           |
|             |            | Luteolin-7- <i>O</i> - hexoside             | 644.07 ± 25.65        | a        | 508.69 ± 11.18        | a        | 568.56 ± 27.01        | a        | NS           |
|             |            | <b>Total analyzed Flavone</b>               | <b>837.36 ± 34.72</b> | <b>a</b> | <b>748.38 ± 45.24</b> | <b>a</b> | <b>770.58 ± 44.22</b> | <b>a</b> | NS           |

|          |                                             |                        |          |                        |          |                        |          |     |
|----------|---------------------------------------------|------------------------|----------|------------------------|----------|------------------------|----------|-----|
| Placenta | Kaempferol dihexoside                       | 7.75 ± 2.89            | a        | 2.80 ± 0.24            | a        | 2.63 ± 0.94            | a        | NS  |
|          | Quercetin rutinoside                        | 14.81 ± 3.16           | a        | 7.52 ± 0.24            | a        | 7.78 ± 0.45            | a        | NS  |
|          | Quercetin rhamnoside                        | 163.72 ± 6.81          | a        | 129.32 ± 5.98          | a        | 227.23 ± 5.32          | a        | NS  |
|          | Isoramnetin rhamnoside                      | 30.76 ± 4.69           | a        | 14.26 ± 4.57           | a        | 23.87 ± 1.24           | a        | NS  |
|          | <b>Total analyzed Flavonols</b>             | <b>217.04 ± 7.47</b>   | <b>a</b> | <b>153.90 ± 9.60</b>   | <b>a</b> | <b>261.51 ± 13.52</b>  | <b>a</b> | NS  |
|          | <b>Total analyzed phenolics</b>             | <b>1201.89 ± 64.99</b> | <b>a</b> | <b>1033.34 ± 43.57</b> | <b>a</b> | <b>1219.45 ± 54.74</b> | <b>a</b> | NS  |
|          | Coumaroylquinic acid derivative 1           | 39.33 ± 14.07          | a        | 52.23 ± 16.08          | a        | 85.52 ± 11.23          | a        | NS  |
|          | Caffeic acid hexoside derivative            | 87.10 ± 11.61          | a        | 196.82 ± 58.70         | a        | 267.66 ± 31.88         | a        | NS  |
|          | Ferulic acid hexoside 1                     | 155.61 ± 46.88         | a        | 259.49 ± 79.09         | a        | 387.70 ± 43.99         | a        | NS  |
|          | <b>Total analyzed Hydroxycinnamic acids</b> | <b>282.04 ± 21.09</b>  | <b>c</b> | <b>508.54 ± 20.67</b>  | <b>b</b> | <b>740.88 ± 32.63</b>  | <b>a</b> | *** |
|          | Apigenin pentosyl hexoside 1                | 28.81 ± 4.88           | a        | 53.83 ± 16.32          | a        | 41.53 ± 8.20           | a        | NS  |
|          | Luteolin-8-C-hexoside 1                     | 586.04 ± 245.96        | b        | 734.40 ± 119.81        | a        | 544.52 ± 28.21         | b        | **  |
|          | Tricin                                      | 524.95 ± 207.03        | b        | 517.74 ± 151.90        | b        | 812.36 ± 69.18         | a        | *** |
|          | <b>Total analyzed Flavone</b>               | <b>1139.79 ± 32.75</b> | <b>b</b> | <b>1305.97 ± 54.77</b> | <b>a</b> | <b>1398.40 ± 65.22</b> | <b>a</b> | *** |
|          | Quercetin rhamnoside                        | 17.32 ± 4.38           | a        | 20.07 ± 7.89           | a        | 37.65 ± 30.04          | a        | NS  |
|          | <b>Total analyzed Flavonols</b>             | <b>17.32 ± 4.38</b>    | <b>a</b> | <b>20.07 ± 7.89</b>    | <b>a</b> | <b>37.65 ± 30.04</b>   | <b>a</b> | NS  |
|          | <b>Total analyzed phenolics</b>             | <b>1493.15 ± 24.63</b> | <b>c</b> | <b>1834.58 ± 45.74</b> | <b>b</b> | <b>2176.93 ± 87.36</b> | <b>a</b> | *** |
| Seeds    | Caffeic acid hexoside 2                     | 31.10 ± 5.07           | a        | 20.29 ± 0.73           | a        | 30.61 ± 5.28           | a        | NS  |
|          | Ferulic acid hexoside 1                     | 8.19 ± 5.39            | c        | 22.31 ± 3.76           | b        | 43.45 ± 15.14          | a        | *** |
|          | Ferulic acid hexoside 2                     | 8.10 ± 2.29            | a        | 7.82 ± 2.51            | a        | 8.44 ± 0.84            | a        | NS  |
|          | Caffeic acid hexoside 3                     | 28.60 ± 10.63          | a        | 21.99 ± 11.04          | a        | 12.98 ± 5.55           | a        | NS  |



|                                             |                         |          |                         |          |                         |          |            |
|---------------------------------------------|-------------------------|----------|-------------------------|----------|-------------------------|----------|------------|
| <b>Total analyzed Hydroxycinnamic acids</b> | <b>75.99 ± 1.42</b>     | <b>b</b> | <b>72.40 ± 1.46</b>     | <b>b</b> | <b>95.48 ± 1.72</b>     | <b>a</b> | <b>***</b> |
| Luteolin-8-C-hexoside 1                     | 2313.24 ± 852.99        | <b>b</b> | 2370.60 ± 238.65        | <b>b</b> | 2733.34 ± 186.26        | <b>a</b> | <b>***</b> |
| Luteolin-8-C-hexoside 2                     | 240.19 ± 17.84          | <b>a</b> | 176.87 ± 26.01          | <b>a</b> | 239.70 ± 59.71          | <b>a</b> | NS         |
| <b>Total analyzed Flavone</b>               | <b>2553.42 ± 437.36</b> | <b>b</b> | <b>2547.47 ± 532.47</b> | <b>b</b> | <b>2973.03 ± 456.73</b> | <b>a</b> | <b>**</b>  |
| Kempferol hexoside 1                        | 21.09 ± 10.09           | <b>a</b> | 19.42 ± 3.51            | <b>a</b> | 22.60 ± 5.03            | <b>a</b> | NS         |
| Kempferol hexoside 2                        | 176.61 ± 13.49          | <b>a</b> | 161.83 ± 0.87           | <b>a</b> | 129.28 ± 20.90          | <b>a</b> | NS         |
| <b>Total analyzed Flavonols</b>             | <b>197.69 ± 2.52</b>    | <b>a</b> | <b>181.25 ± 2.04</b>    | <b>a</b> | <b>151.87 ± 2.01</b>    | <b>a</b> | NS         |
| <b>Total analyzed phenolics</b>             | <b>2827.11 ± 232.52</b> | <b>b</b> | <b>2801.13 ± 321.53</b> | <b>b</b> | <b>3220.40 ± 432.42</b> | <b>a</b> | <b>***</b> |

---

different letters in the row (a, b, c) indicates statistical differences among treatments Significance codes: \*\*\* ≤ 0.001; \*\* ≤ 0.01; \* ≤ 0.05; NS > 0.05

**Table S3.** Individual and total phenolics of three fruit parts of the 'Berenyi F1' cultivar under salt stressed (mg 100 g<sup>-1</sup> DW; mean  $\pm$  SE).

| Cultivar     | Fruit part | Phenolics                                   | Treatment                              |                                        |                                        |              |  |
|--------------|------------|---------------------------------------------|----------------------------------------|----------------------------------------|----------------------------------------|--------------|--|
|              |            |                                             | Control                                | 20 mM NaCl                             | 40 mM NaCl                             | Significance |  |
| 'Berenyi F1' | Pericarp   | Coumaroylquinic acid derivative 1           | 9.83 $\pm$ 2.05 a                      | 10.10 $\pm$ 2.77 a                     | 9.16 $\pm$ 3.23 a                      | NS           |  |
|              |            | Caffeic acid hexoside 1                     | 33.22 $\pm$ 5.01 b                     | 46.35 $\pm$ 4.34 a                     | 43.35 $\pm$ 6.09 a                     | **           |  |
|              |            | Caffeic acid hexoside 2                     | 10.77 $\pm$ 4.33 a                     | 8.11 $\pm$ 4.11 a                      | 19.15 $\pm$ 5.20 a                     | NS           |  |
|              |            | <i>p</i> -coumaroylquinic acid              | 6.52 $\pm$ 1.33 a                      | 5.82 $\pm$ 0.96 a                      | 10.61 $\pm$ 2.69 a                     | NS           |  |
|              |            | Caffeic acid hexoside derivative            | 53.16 $\pm$ 7.02 a                     | 28.27 $\pm$ 13.90 a                    | 54.15 $\pm$ 10.31 a                    | NS           |  |
|              |            | Ferulic acid hexoside 1                     | 71.96 $\pm$ 10.61 a                    | 28.73 $\pm$ 11.44 b                    | 82.94 $\pm$ 14.48 a                    | ***          |  |
|              |            | Ferulic acid hexoside 2                     | 5.49 $\pm$ 1.09 a                      | 3.94 $\pm$ 1.75 a                      | 3.57 $\pm$ 0.75 a                      | NS           |  |
|              |            | Chlorogenic acid                            | 16.65 $\pm$ 4.00 b                     | 58.03 $\pm$ 40.07 a                    | 13.14 $\pm$ 5.51 b                     | ***          |  |
|              |            | <b>Total analyzed Hydroxycinnamic acids</b> | <b>207.60 <math>\pm</math> 10.77 b</b> | <b>189.35 <math>\pm</math> 9.84 b</b>  | <b>236.07 <math>\pm</math> 12.63 a</b> | <b>***</b>   |  |
|              |            | Apigenin pentosyl hexoside 1                | 8.71 $\pm$ 2.79 a                      | 10.01 $\pm$ 1.63 a                     | 7.39 $\pm$ 1.44 a                      | NS           |  |
|              |            | Apigenin pentosyl hexoside 2                | 3.10 $\pm$ 0.20 a                      | 8.53 $\pm$ 3.43 a                      | 2.59 $\pm$ 0.85 a                      | NS           |  |
|              |            | Apigenin pentosyl hexoside 3                | 18.49 $\pm$ 2.15 a                     | 19.45 $\pm$ 11.95 a                    | 21.57 $\pm$ 4.18 a                     | NS           |  |
|              |            | Luteolin-8-C-hexoside 1                     | 230.46 $\pm$ 50.78 a                   | 129.77 $\pm$ 63.76 b                   | 88.62 $\pm$ 12.72 b                    | **           |  |
|              |            | Luteolin-8-C-hexoside 2                     | 197.93 $\pm$ 2.96 a                    | 155.58 $\pm$ 5.60 a                    | 174.01 $\pm$ 4.85 a                    | NS           |  |
|              |            | Luteolin-7- <i>O</i> - hexoside             | 254.93 $\pm$ 2.44 c                    | 353.62 $\pm$ 9.38 b                    | 416.46 $\pm$ 44.77 a                   | ***          |  |
|              |            | <b>Total analyzed Flavone</b>               | <b>713.61 <math>\pm</math> 21.08 a</b> | <b>676.95 <math>\pm</math> 10.63 a</b> | <b>710.64 <math>\pm</math> 9.75 a</b>  | <b>NS</b>    |  |
|              |            | Kaempferol dihexoside                       | 2.22 $\pm$ 0.74 a                      | 5.24 $\pm$ 2.80 a                      | 0.74 $\pm$ 0.51 a                      | NS           |  |

|          |                                             |                         |          |                         |          |                         |     |
|----------|---------------------------------------------|-------------------------|----------|-------------------------|----------|-------------------------|-----|
|          | Quercetin rutinoside                        | N/D                     |          | N/D                     |          | N/D                     | NS  |
|          | Quercetin rhamnoside                        | 92.27 ± 7.37            | a        | 121.64 ± 9.29           | a        | 107.29 ± 4.12           | NS  |
|          | Isoramnnetin rhamnoside                     | 26.84 ± 1.79            | b        | 35.31 ± 7.33            | a        | 34.87 ± 7.26            | *** |
|          | <b>Total analyzed Flavonols</b>             | <b>121.33 ± 1.75</b>    | <b>a</b> | <b>162.19 ± 2.07</b>    | <b>a</b> | <b>142.90 ± 1.88</b>    | NS  |
|          | <b>Total analyzed phenolics</b>             | <b>1042.54 ± 67.73</b>  | <b>a</b> | <b>1028.49 ± 59.34</b>  | <b>a</b> | <b>1089.61 ± 44.64</b>  | NS  |
| Placenta | Coumaroylquinic acid derivative 1           | 51.87 ± 16.65           | a        | 31.29 ± 5.24            | a        | 25.41 ± 7.27            | NS  |
|          | Caffeic acid hexoside derivative            | 181.90 ± 32.42          | a        | 220.74 ± 20.36          | a        | 180.99 ± 36.84          | NS  |
|          | Ferulic acid hexoside 1                     | 250.04 ± 34.79          | a        | 283.25 ± 39.73          | a        | 265.40 ± 35.34          | NS  |
|          | <b>Total analyzed Hydroxycinnamic acids</b> | <b>483.81 ± 23.63</b>   | <b>a</b> | <b>535.28 ± 33.58</b>   | <b>a</b> | <b>471.80 ± 48.00</b>   | NS  |
|          | Apigenin pentysil hexoside 1                | 33.46 ± 3.08            | a        | 35.83 ± 6.50            | a        | 27.14 ± 1.42            | NS  |
|          | Luteolin-8-C-hexoside 1                     | 648.93 ± 53.20          | a        | 806.15 ± 88.19          | a        | 659.29 ± 28.70          | NS  |
|          | Tricin                                      | 386.81 ± 107.47         | a        | 271.96 ± 47.16          | a        | 404.62 ± 31.77          | NS  |
|          | <b>Total analyzed Flavone</b>               | <b>1069.20 ± 25.42</b>  | <b>a</b> | <b>1113.93 ± 54.58</b>  | <b>a</b> | <b>1091.04 ± 39.64</b>  | NS  |
|          | Quercetin rhamnoside                        | 27.44 ± 21.84           | a        | 28.79 ± 18.24           | a        | 9.07 ± 2.02             | NS  |
|          | <b>Total analyzed Flavonols</b>             | <b>27.44 ± 21.84</b>    | <b>a</b> | <b>28.79 ± 18.24</b>    | <b>a</b> | <b>9.07 ± 2.02</b>      | NS  |
|          | <b>Total analyzed phenolics</b>             | <b>1580.45 ± 133.49</b> | <b>a</b> | <b>1678.00 ± 143.64</b> | <b>a</b> | <b>1571.91 ± 166.63</b> | NS  |
| Seeds    | Caffeic acid hexoside 2                     | 23.02 ± 2.08            | a        | 21.75 ± 1.18            | a        | 22.81 ± 0.91            | NS  |
|          | Ferulic acid hexoside 1                     | 10.20 ± 3.63            | a        | 9.07 ± 1.46             | a        | 25.23 ± 10.41           | NS  |
|          | Ferulic acid hexoside 2                     | 6.27 ± 0.08             | a        | 6.27 ± 0.35             | a        | 6.59 ± 0.64             | NS  |
|          | Caffeic acid hexoside 3                     | 6.16 ± 1.82             | a        | 7.08 ± 1.26             | a        | 6.61 ± 1.81             | NS  |
|          | <b>Total analyzed Hydroxycinnamic acids</b> | <b>45.64 ± 1.43</b>     | <b>a</b> | <b>44.17 ± 1.50</b>     | <b>b</b> | <b>61.23 ± 1.67</b>     | *** |

|                                 |                         |          |                         |          |                         |           |            |
|---------------------------------|-------------------------|----------|-------------------------|----------|-------------------------|-----------|------------|
| Luteolin-8-C-hexoside 1         | 3687.84 ± 229.04        | <b>a</b> | 4177.32 ± 613.57        | <b>a</b> | 3880.09 ± 365.23        | <b>a</b>  | NS         |
| Luteolin-8-C-hexoside 2         | 140.93 ± 16.31          | <b>a</b> | 130.35 ± 10.79          | <b>a</b> | 167.68 ± 19.50          | <b>a</b>  | NS         |
| <b>Total analyzed Flavone</b>   | <b>3828.76 ± 284.84</b> | <b>b</b> | <b>4307.66 ± 363.60</b> | <b>a</b> | <b>4047.76 ± 401.46</b> | <b>ab</b> | <b>**</b>  |
| Kempferol hexoside 1            | 37.02 ± 1.11            | <b>a</b> | 33.08 ± 0.94            | <b>a</b> | 40.03 ± 4.67            | <b>a</b>  | NS         |
| Kempferol hexoside 2            | 157.73 ± 2.00           | <b>a</b> | 131.60 ± 9.54           | <b>a</b> | 149.43 ± 4.21           | <b>a</b>  | NS         |
| <b>Total analyzed Flavonols</b> | <b>194.75 ± 2.47</b>    | <b>a</b> | <b>164.67 ± 1.99</b>    | <b>a</b> | <b>189.45 ± 1.68</b>    | <b>a</b>  | NS         |
| <b>Total analyzed phenolics</b> | <b>4069.15 ± 305.47</b> | <b>b</b> | <b>4516.51 ± 436.42</b> | <b>a</b> | <b>4298.46 ± 399.47</b> | <b>a</b>  | <b>***</b> |

---

N/D = not determined; different letters in the row (a, b, c) indicates statistical differences among treatments Significance codes: \*\*\* ≤ 0.001; \*\* ≤ 0.01; \* ≤ 0.05; NS > 0.05

**Table S4.** Individual and total phenolics of three fruit parts of the 'Caro F1' cultivar under salt stressed (mg 100 g<sup>-1</sup> DW; mean ± SE).

| Cultivar  | Fruit part | Phenolics                                   | Treatment              |                          |                           |  |  | Significance |
|-----------|------------|---------------------------------------------|------------------------|--------------------------|---------------------------|--|--|--------------|
|           |            |                                             | Control                | 20 mM NaCl               | 40 mM NaCl                |  |  |              |
| 'Caro F1' | Pericarp   | Coumaroylquinic acid derivative 1           | 13.57 ± 2.35 c         | 38.56 ± 2.35 a           | 16.89 ± 9.52 b            |  |  | **           |
|           |            | Caffeic acid hexoside 1                     | 9.98 ± 0.59 b          | 24.16 ± 7.78 a           | 21.84 ± 4.11 a            |  |  | ***          |
|           |            | Caffeic acid hexoside 2                     | 16.23 ± 2.24 a         | 31.46 ± 5.98 a           | 34.18 ± 3.85 a            |  |  | NS           |
|           |            | <i>p</i> -coumaroylquinic acid              | 2.91 ± 1.22 c          | 13.86 ± 6.51 b           | 23.52 ± 6.68 a            |  |  | ***          |
|           |            | Caffeic acid hexoside derivative            | 19.88 ± 4.91 b         | 30.07 ± 3.62 a           | 27.69 ± 8.31 a            |  |  | ***          |
|           |            | Ferulic acid hexoside 1                     | 10.94 ± 2.48 b         | 31.37 ± 1.64 a           | 27.84 ± 1.32 a            |  |  | ***          |
|           |            | Ferulic acid hexoside 2                     | 2.73 ± 1.66 b          | 4.10 ± 0.99 a            | 5.59 ± 0.30 a             |  |  | ***          |
|           |            | Chlorogenic acid                            | 11.76 ± 2.78 c         | 16.96 ± 6.70 b           | 36.79 ± 4.42 a            |  |  | ***          |
|           |            | <b>Total analyzed Hydroxycinnamic acids</b> | <b>88.00 ± 2.68 b</b>  | <b>190.54 ± 10.74 a</b>  | <b>194.34 ± 10.85 a</b>   |  |  | ***          |
|           |            | Apigenin pentosyl hexoside 1                | 16.80 ± 7.92 a         | 14.50 ± 9.55 a           | 7.09 ± 1.75 a             |  |  | NS           |
|           |            | Apigenin pentosyl hexoside 2                | 10.98 ± 6.99 a         | 7.94 ± 1.83 a            | 17.52 ± 4.84 a            |  |  | NS           |
|           |            | Apigenin pentosyl hexoside 3                | 16.10 ± 4.86 a         | 18.73 ± 1.68 a           | 37.89 ± 14.77 a           |  |  | NS           |
|           |            | Luteolin-8-C-hexoside 1                     | 176.30 ± 16.53 c       | 284.46 ± 117.92 b        | 379.29 ± 26.33 a          |  |  | **           |
|           |            | Luteolin-8-C-hexoside 2                     | 137.21 ± 26.78 a       | 173.00 ± 55.01 a         | 133.23 ± 26.51 a          |  |  | NS           |
|           |            | Luteolin-7- <i>O</i> - hexoside             | 396.20 ± 28.31 c       | 751.76 ± 50.17 b         | 924.38 ± 17.86 a          |  |  | ***          |
|           |            | <b>Total analyzed Flavone</b>               | <b>753.60 ± 5.53 c</b> | <b>1250.38 ± 97.63 b</b> | <b>1499.40 ± 101.57 a</b> |  |  | ***          |
|           |            | Kaempferol dihexoside                       | 2.50 ± 3.60 c          | 5.01 ± 8.47 b            | 8.98 ± 9.43 a             |  |  | **           |

|          |                                             |                        |          |                        |          |                         |          |            |
|----------|---------------------------------------------|------------------------|----------|------------------------|----------|-------------------------|----------|------------|
| Placenta | Quercetin rutinoside                        | 43.33 ± 7.14           | c        | 60.74 ± 32.75          | b        | 128.39 ± 19.63          | a        | ***        |
|          | Quercetin rhamnoside                        | 123.04 ± 25.50         | c        | 321.61 ± 32.60         | b        | 432.93 ± 34.22          | a        | **         |
|          | Isoramnetin rhamnoside                      | 17.74 ± 5.52           | c        | 29.18 ± 7.63           | b        | 39.35 ± 1.50            | a        | ***        |
|          | <b>Total analyzed Flavonols</b>             | <b>186.61 ± 1.24</b>   | <b>c</b> | <b>416.54 ± 2.46</b>   | <b>b</b> | <b>609.65 ± 5.99</b>    | <b>a</b> | <b>***</b> |
|          | <b>Total analyzed phenolics</b>             | <b>1028.21 ± 78.89</b> | <b>c</b> | <b>1857.46 ± 99.47</b> | <b>b</b> | <b>2303.39 ± 127.54</b> | <b>a</b> | <b>***</b> |
|          | Coumaroylquinic acid derivative 1           | 16.59 ± 1.03           | c        | 158.81 ± 8.37          | a        | 66.05 ± 8.46            | b        | ***        |
|          | Caffeic acid hexoside derivative            | 64.21 ± 11.89          | a        | 128.64 ± 25.28         | a        | 82.99 ± 5.57            | a        | NS         |
|          | Ferulic acid hexoside 1                     | 79.10 ± 32.20          | a        | 145.10 ± 46.39         | a        | 74.58 ± 8.88            | a        | NS         |
|          | <b>Total analyzed Hydroxycinnamic acids</b> | <b>159.90 ± 11.53</b>  | <b>b</b> | <b>432.55 ± 43.60</b>  | <b>a</b> | <b>223.62 ± 32.45</b>   | <b>b</b> | <b>***</b> |
|          | Apigenin pentysil hexoside 1                | 34.46 ± 15.25          | a        | 52.95 ± 18.00          | a        | 28.20 ± 5.41            | a        | NS         |
|          | Luteolin-8-C-hexoside 1                     | 804.98 ± 88.34         | a        | 436.74 ± 40.89         | b        | 519.22 ± 120.73         | b        | ***        |
|          | Tricin                                      | 366.43 ± 39.89         | a        | 325.15 ± 17.15         | a        | 217.76 ± 45.34          | a        | NS         |
|          | <b>Total analyzed Flavone</b>               | <b>1205.87 ± 77.34</b> | <b>a</b> | <b>814.83 ± 54.42</b>  | <b>b</b> | <b>765.19 ± 43.42</b>   | <b>b</b> | <b>***</b> |
|          | Quercetin rhamnoside                        | 75.23 ± 37.70          | a        | 23.77 ± 14.83          | b        | 30.21 ± 15.71           | b        | ***        |
|          | <b>Total analyzed Flavonols</b>             | <b>75.22 ± 6.52</b>    | <b>a</b> | <b>23.76 ± 1.08</b>    | <b>b</b> | <b>30.21 ± 1.99</b>     | <b>b</b> | <b>***</b> |
|          | <b>Total analyzed phenolics</b>             | <b>1440.99 ± 77.74</b> | <b>a</b> | <b>1271.14 ± 84.25</b> | <b>b</b> | <b>1019.02 ± 25.55</b>  | <b>b</b> | <b>***</b> |
| Seeds    | Caffeic acid hexoside 2                     | 18.10 ± 1.74           | a        | 19.94 ± 1.69           | a        | 15.32 ± 2.38            | a        | NS         |
|          | Ferulic acid hexoside 1                     | 7.44 ± 1.93            | b        | 12.08 ± 4.06           | a        | 15.64 ± 2.22            | a        | **         |
|          | Ferulic acid hexoside 2                     | 4.50 ± 0.82            | a        | 6.20 ± 0.31            | a        | 6.35 ± 0.59             | a        | NS         |
|          | Caffeic acid hexoside 3                     | 6.22 ± 3.32            | a        | 6.69 ± 0.36            | a        | 9.92 ± 6.25             | a        | NS         |
|          | <b>Total analyzed Hydroxycinnamic acids</b> | <b>36.25 ± 1.75</b>    | <b>b</b> | <b>44.90 ± 2.77</b>    | <b>a</b> | <b>47.23 ± 2.52</b>     | <b>a</b> | <b>***</b> |

|                                 |                         |          |                         |          |                         |          |     |
|---------------------------------|-------------------------|----------|-------------------------|----------|-------------------------|----------|-----|
| Luteolin-8-C-hexoside 1         | 2269.96 ± 60.15         | <b>a</b> | 1486.43 ± 214.45        | <b>b</b> | 1090.42 ± 92.76         | <b>c</b> | *** |
| Luteolin-8-C-hexoside 2         | 155.85 ± 17.91          | <b>a</b> | 267.99 ± 50.61          | <b>a</b> | 241.51 ± 28.13          | <b>a</b> | NS  |
| <b>Total analyzed Flavone</b>   | <b>2425.80 ± 43.64</b>  | <b>a</b> | <b>1754.42 ± 50.65</b>  | <b>b</b> | <b>1331.92 ± 54.35</b>  | <b>c</b> | *** |
| Kempferol hexoside 1            | 33.51 ± 7.00            | <b>a</b> | 15.79 ± 5.05            | <b>b</b> | 14.63 ± 2.89            | <b>b</b> | *** |
| Kempferol hexoside 2            | 89.25 ± 11.46           | <b>a</b> | 84.23 ± 19.70           | <b>a</b> | 64.58 ± 16.06           | <b>a</b> | NS  |
| <b>Total analyzed Flavonols</b> | <b>122.75 ± 5.67</b>    | <b>a</b> | <b>100.02 ± 5.09</b>    | <b>b</b> | <b>79.20 ± 2.53</b>     | <b>b</b> | *** |
| <b>Total analyzed phenolics</b> | <b>2584.82 ± 452.36</b> | <b>a</b> | <b>1899.34 ± 325.50</b> | <b>b</b> | <b>1458.36 ± 408.74</b> | <b>c</b> | *** |

---

different letters in the row (a, b, c) indicates statistical differences among treatments Significance codes: \*\*\* ≤ 0.001; \*\* ≤ 0.01; \* ≤ 0.05; NS > 0.05

**Table S5.** Individual and total capsaicinoid contents of three fruit parts of the four cultivars under salt stressed (mg 100 g<sup>-1</sup> DW; mean ± SE).

|            | Treatment / capsaicinoid   | Treatment            |                       |                        | Significance |
|------------|----------------------------|----------------------|-----------------------|------------------------|--------------|
|            |                            | Control              | 20 mM NaCl            | 40 mM NaCl             |              |
|            | Capsaicin                  | 0.02 ± 0.01 c        | 1.86 ± 0.06 b         | 2.67 ± 0.24 a          | ***          |
|            | Dihydrocapsaicin           | 0.01 ± 0.00 c        | 0.28 ± 0.05 a         | 0.31 ± 0.08 a          | ***          |
|            | Nordihydrocapsaicin        | N/D                  | N/D                   | N/D                    | NS           |
|            | Homocapsaicin              | N/D                  | N/D                   | N/D                    | NS           |
|            | Homodihydrocapsaicin       | N/D                  | N/D                   | N/D                    | NS           |
|            | <b>Total capsaicinoids</b> | <b>0.03 ± 0.01 c</b> | <b>2.15 ± 0.13 b</b>  | <b>2.99 ± 0.53 a</b>   | <b>***</b>   |
| 'Somborka' | Capsaicin                  | 0.19 ± 0.04 c        | 14.39 ± 1.95 b        | 202.77 ± 2.80 a        | ***          |
|            | Dihydrocapsaicin           | 0.05 ± 0.02 c        | 2.51 ± 0.40 b         | 25.85 ± 5.71 a         | ***          |
|            | Nordihydrocapsaicin        | 0.00 ± 0.00 c        | 0.12 ± 0.03 b         | 0.55 ± 0.55 a          | **           |
|            | Homocapsaicin              | 0.02 ± 0.01 c        | 0.47 ± 0.14 b         | 3.42 ± 3.42 a          | ***          |
|            | Homodihydrocapsaicin       | 0.00 ± 0.00 c        | 0.14 ± 0.02 b         | 0.99 ± 0.98 a          | ***          |
|            | <b>Total capsaicinoids</b> | <b>0.26 ± 0.07 c</b> | <b>17.64 ± 2.54 b</b> | <b>233.58 ± 3.45 a</b> | <b>***</b>   |
| Seeds      | Capsaicin                  | 0.54 ± 0.20 c        | 3.82 ± 0.30 a         | 2.04 ± 1.08 b          | ***          |
|            | Dihydrocapsaicin           | 0.06 ± 0.01 c        | 0.62 ± 0.04 a         | 0.33 ± 0.16 b          | ***          |
|            | Nordihydrocapsaicin        | 0.00 ± 0.00 b        | 0.03 ± 0.00 a         | 0.01 ± 0.01 a          | ***          |
|            | Homocapsaicin              | 0.02 ± 0.01 b        | 0.05 ± 0.03 a         | 0.04 ± 0.03 a          | ***          |
|            | Homodihydrocapsaicin       | N/D                  | N/D                   | N/D                    | NS           |
|            |                            |                      |                       |                        |              |



|              |          |                            |                       |                         |                         |            |
|--------------|----------|----------------------------|-----------------------|-------------------------|-------------------------|------------|
|              |          | <b>Total capsaicinoids</b> | <b>0.62 ± 0.22 c</b>  | <b>4.52 ± 0.22 a</b>    | <b>2.44 ± 1.30 b</b>    | <b>***</b> |
| 'Novosadka'  | Pericarp | Capsaicin                  | 4.32 ± 1.14 c         | 73.35 ± 1.36 b          | 195.95 ± 7.75 a         | ***        |
|              |          | Dihydrocapsaicin           | 0.61 ± 0.15 c         | 11.17 ± 3.60 b          | 38.55 ± 2.33 a          | ***        |
|              |          | Nordihydrocapsaicin        | 0.04 ± 0.01 c         | 0.48 ± 0.17 b           | 1.85 ± 0.06 a           | ***        |
|              |          | Homocapsaicin              | 0.07 ± 0.03 c         | 3.26 ± 1.21 b           | 11.74 ± 0.43 a          | ***        |
|              |          | Homodihydrocapsaicin       | 0.02 ± 0.00 c         | 0.87 ± 0.42 b           | 4.06 ± 0.12 a           | ***        |
|              |          | <b>Total capsaicinoids</b> | <b>5.06 ± 1.34 c</b>  | <b>89.12 ± 6.77 b</b>   | <b>252.15 ± 10.70 a</b> | <b>***</b> |
|              | Placenta | Capsaicin                  | 27.11 ± 2.60 c        | 184.87 ± 6.90 b         | 526.04 ± 3.88 a         | ***        |
|              |          | Dihydrocapsaicin           | 5.44 ± 0.60 c         | 42.54 ± 12.34 b         | 118.07 ± 9.98 a         | ***        |
|              |          | Nordihydrocapsaicin        | 0.41 ± 0.09 c         | 1.92 ± 0.35 b           | 5.61 ± 0.37 a           | ***        |
|              |          | Homocapsaicin              | 0.81 ± 0.04 c         | 6.63 ± 1.93 b           | 28.58 ± 1.88 a          | ***        |
|              |          | Homodihydrocapsaicin       | 0.38 ± 0.07 c         | 3.17 ± 0.45 b           | 9.95 ± 0.48 a           | ***        |
|              |          | <b>Total capsaicinoids</b> | <b>34.15 ± 3.38 c</b> | <b>239.12 ± 6.97 b</b>  | <b>688.25 ± 4.59 a</b>  | <b>***</b> |
|              | Seeds    | Capsaicin                  | 13.57 ± 2.52 c        | 116.41 ± 2.39 b         | 388.97 ± 4.24 a         | ***        |
|              |          | Dihydrocapsaicin           | 3.06 ± 0.73 c         | 29.96 ± 6.90 b          | 120.05 ± 10.24 a        | ***        |
|              |          | Nordihydrocapsaicin        | 0.20 ± 0.05 c         | 1.47 ± 0.39 b           | 7.11 ± 0.57 a           | ***        |
|              |          | Homocapsaicin              | 0.64 ± 0.14 c         | 4.95 ± 1.65 b           | 32.58 ± 3.77 a          | **         |
|              |          | Homodihydrocapsaicin       | 0.19 ± 0.06 c         | 1.93 ± 0.60 b           | 13.35 ± 1.69 a          | ***        |
|              |          | <b>Total capsaicinoids</b> | <b>17.67 ± 3.50 c</b> | <b>154.71 ± 30.93 b</b> | <b>562.05 ± 50.50 a</b> | <b>***</b> |
| 'Berenyi F1' | Pericarp | Capsaicin                  | 8.47 ± 2.28 b         | 20.95 ± 14.49 a         | 18.09 ± 5.42 a          | ***        |
|              |          | Dihydrocapsaicin           | 1.19 ± 0.34 b         | 2.86 ± 2.13 a           | 2.93 ± 1.01 a           | ***        |
|              |          | Nordihydrocapsaicin        | 0.06 ± 0.03 b         | 0.18 ± 0.16 a           | 0.25 ± 0.13 a           | **         |

|                    |                            |                      |          |                      |          |                       |          |            |
|--------------------|----------------------------|----------------------|----------|----------------------|----------|-----------------------|----------|------------|
|                    | Homocapsaicin              | 0.48 ± 0.15          | c        | 0.76 ± 0.44          | b        | 1.27 ± 0.54           | a        | ***        |
|                    | Homodihydrocapsaicin       | 0.26 ± 0.03          | a        | 0.29 ± 0.20          | a        | 0.55 ± 0.26           | a        | NS         |
|                    | <b>Total capsaicinoids</b> | <b>10.46 ± 2.83</b>  | <b>b</b> | <b>25.05 ± 17.43</b> | <b>a</b> | <b>23.08 ± 7.36</b>   | <b>a</b> | <b>***</b> |
| Placenta           | Capsaicin                  | 201.54 ± 7.41        | a        | 114.84 ± 6.68        | a        | 173.41 ± 3.84         | a        | NS         |
|                    | Dihydrocapsaicin           | 38.96 ± 13.78        | a        | 18.67 ± 8.07         | a        | 30.39 ± 3.13          | a        | NS         |
|                    | Nordihydrocapsaicin        | 4.08 ± 2.22          | a        | 1.91 ± 0.86          | a        | 1.83 ± 0.37           | a        | NS         |
|                    | Homocapsaicin              | 15.71 ± 4.28         | a        | 7.87 ± 3.12          | a        | 12.95 ± 1.78          | a        | NS         |
|                    | Homodihydrocapsaicin       | 10.79 ± 5.33         | a        | 5.30 ± 2.30          | a        | 4.61 ± 0.64           | a        | NS         |
|                    | <b>Total capsaicinoids</b> | <b>271.09 ± 9.02</b> | <b>a</b> | <b>148.59 ± 6.02</b> | <b>a</b> | <b>223.19 ± 29.77</b> | <b>a</b> | <b>NS</b>  |
| Seeds              | Capsaicin                  | 27.89 ± 4.57         | b        | 29.30 ± 3.14         | ab       | 42.92 ± 9.73          | a        | ***        |
|                    | Dihydrocapsaicin           | 4.88 ± 1.13          | b        | 4.06 ± 0.38          | b        | 11.13 ± 3.97          | a        | ***        |
|                    | Nordihydrocapsaicin        | 0.25 ± 0.08          | a        | 0.24 ± 0.08          | a        | 1.34 ± 0.84           | a        | NS         |
|                    | Homocapsaicin              | 1.55 ± 0.19          | a        | 1.27 ± 0.19          | a        | 2.68 ± 0.49           | a        | NS         |
|                    | Homodihydrocapsaicin       | 0.56 ± 0.07          | a        | 0.45 ± 0.08          | a        | 1.94 ± 1.13           | a        | NS         |
|                    | <b>Total capsaicinoids</b> | <b>35.14 ± 6.05</b>  | <b>b</b> | <b>35.32 ± 3.87</b>  | <b>b</b> | <b>60.00 ± 16.16</b>  | <b>a</b> | <b>***</b> |
| 'Caro F1' Pericarp | Capsaicin                  | 26.23 ± 1.04         | c        | 75.91 ± 7.86         | b        | 119.14 ± 9.46         | a        | **         |
|                    | Dihydrocapsaicin           | 7.09 ± 2.83          | c        | 11.60 ± 7.91         | b        | 28.56 ± 6.79          | a        | ***        |
|                    | Nordihydrocapsaicin        | 0.25 ± 0.14          | c        | 0.67 ± 0.38          | b        | 2.57 ± 0.51           | a        | *          |
|                    | Homocapsaicin              | 0.83 ± 0.42          | c        | 2.73 ± 2.03          | b        | 5.07 ± 0.79           | a        | ***        |
|                    | Homodihydrocapsaicin       | 0.56 ± 0.28          | c        | 1.03 ± 0.72          | b        | 2.93 ± 0.54           | a        | ***        |
|                    | <b>Total capsaicinoids</b> | <b>34.96 ± 2.72</b>  | <b>c</b> | <b>91.94 ± 8.90</b>  | <b>b</b> | <b>158.27 ± 8.09</b>  | <b>a</b> | <b>**</b>  |

|          |                            |                       |          |                        |          |                        |          |            |
|----------|----------------------------|-----------------------|----------|------------------------|----------|------------------------|----------|------------|
| Placenta | Capsaicin                  | 632.97 ± 12.88        | b        | 1145.97 ± 40.29        | a        | 1223.90 ± 33.16        | a        | ***        |
|          | Dihydrocapsaicin           | 109.24 ± 36.03        | c        | 247.79 ± 86.15         | b        | 344.32 ± 144.34        | a        | ***        |
|          | Nordihydrocapsaicin        | 8.66 ± 2.19           | c        | 28.87 ± 7.17           | b        | 41.30 ± 18.44          | a        | ***        |
|          | Homocapsaicin              | 26.16 ± 12.97         | b        | 73.13 ± 32.37          | a        | 73.89 ± 19.90          | a        | ***        |
|          | Homodihydrocapsaicin       | 13.11 ± 4.47          | c        | 49.03 ± 4.72           | b        | 62.73 ± 9.52           | a        | ***        |
|          | <b>Total capsaicinoids</b> | <b>790.15 ± 34.54</b> | <b>c</b> | <b>1544.80 ± 50.69</b> | <b>b</b> | <b>1746.14 ± 55.36</b> | <b>a</b> | <b>***</b> |
| Seeds    | Capsaicin                  | 94.27 ± 10.57         | c        | 163.28 ± 6.34          | b        | 199.71 ± 5.94          | a        | ***        |
|          | Dihydrocapsaicin           | 14.27 ± 1.58          | c        | 28.84 ± 8.03           | b        | 56.21 ± 4.05           | a        | **         |
|          | Nordihydrocapsaicin        | 1.18 ± 0.14           | c        | 3.05 ± 0.63            | b        | 5.92 ± 2.66            | a        | ***        |
|          | Homocapsaicin              | 3.55 ± 0.46           | b        | 8.39 ± 3.86            | a        | 8.67 ± 1.51            | a        | ***        |
|          | Homodihydrocapsaicin       | 1.64 ± 0.04           | c        | 3.69 ± 0.97            | b        | 5.54 ± 2.34            | a        | ***        |
|          | <b>Total capsaicinoids</b> | <b>114.90 ± 12.79</b> | <b>c</b> | <b>207.24 ± 7.83</b>   | <b>b</b> | <b>276.05 ± 7.51</b>   | <b>a</b> | <b>***</b> |

N/D = not determined; different letters in the row (a, b, c) indicates statistical differences among treatments Significance codes: \*\*\* ≤ 0.001; \*\* ≤ 0.01; \* ≤ 0.05; NS > 0.05
